# Supplementary material for: Measurement report: Formation and brownness of aqueous secondary organic aerosol from the aged biomass-burning emissions in the Sichuan Basin, China
Source: Copernicus journal article supplement (doi:10.5194/egusphere-2025-101), 2025-04-11
Supplement: Supplementary file [file egusphere-2025-101-AC2-supplement.pdf]

Dear Reviewers,

We appreciate the comments of reviewers and have revised the manuscript to address the review comments from all reviewers. We have provided a point-to-point response to the concerns, suggestions, and questions. We hope our work could satisfy both the reviewers and the editor. Our answers to each question have been marked in blue text. The annotated line numbers refer to the revised copy of the manuscript.

This manuscript by Peng et al. uses ambient measurements of organic aerosols (OA) chemical composition and aerosol light absorption to understand the relation between the sources of OA and their absorption properties. The authors claim, using positive matrix factorization on OA, that a significant fraction of secondary OA during pollution episodes in the Sichuan Basin originate from the aqueous processing of biomass burning OA in aerosol water. These secondary OA formed in the aqueous phase are further argued to contribute largely to the light absorption by secondary brown carbon.

While this study makes great use of different datasets and statistical methods to understand the relation between OA sources and aerosol light absorption during clean and polluted periods, the text contains a lot of repetitive information that are often not clearly expressed. I also do not understand why this manuscript has been submitted as a measurement report. Indeed, the scientific conclusions from this manuscript are not limited to a description of observations made during a measurement campaign, but are based on parameters calculated/inferred from these observations (e.g., using positive matrix factorization, or a multiple linear regression method).

Below is a list of major and minor comments on the manuscript that I believe should be considered by the authors to facilitate publication into ACP. A number of technical corrections, mostly regarding language, are also suggested for improved clarity.

**Major comments:**

1. The paper often uses terms such as “field observations”, “direct observations”, or “ambient observations” (e.g., lines 24, 266, 526, 551, 559, 575) to refer to aqSOA, its formation and its properties. This is misleading, as aqSOA was not “observed” but is the result of a statistical model (positive matrix factorization). The same goes for the light absorption by secondary brown carbon, which is a value derived from statistical methods (minimum R-squared method and multiple linear regression method). This needs to be clarified in the manuscript.

**Response:** Thanks for the reviewer's comment. We revised the manuscript to clarify this distinction and have updated the terminology to reflect that the values for aqSOA and light absorption by secondary brown carbon are derived from statistical models.

2. I find that a justification and a discussion of the PMF factors is missing in the manuscript. A lot of the discussion is linked to the PMF factors (mostly aqSOA and BBOA), but apart from a short paragraph in the SI where a couple of correlations to external tracers are given, there is little justification and description of the PMF factors. For instance, it is mentioned at lines 45-50 of the SI that the factors were constrained based on factors from the literature, but the description of the way the a-

values were dealt with is confusing (values from 0.7 to 1 deleted for HOA and CCOA, but what about BBOA?).

**Response:** Thanks for the reviewer's comment. We have described the details of OA source apportionment procedures and present detailed diagnostic plots of the PMF results in the supporting information (SI Text S1 and Figures S4–S10). And the figures for the 4-6 factors solutions, the evolution of the  $Q/Q_{\text{exp}}$  for the different number of factors, and  $a$ -values were shown in Figures S4–S8.

#### **"Text S1. Source Apportionment of OA**

Here, the positive matrix factorization (PMF) and multilinear engine (ME2) were implemented on the OA data measured by ToF-ACSM to determine the numbers and types of OA source factors (Paatero 1999; Paatero and Tapper 1994). The data analyses were conducted using the source finder (SoFi, Canonaco et al., 2013) tool version 6.3 for Igor Pro. PMF is a bilinear unmixing model that can describe the variability of a multivariate database as a linear combination of static factor profiles and their corresponding time series, as expressed in Eq. (S1):

$$X=GF+E \quad (S1)$$

where  $X$  refers to the measured OA mass spectral matrix containing  $i$  rows and  $j$  columns,  $F$  contains the factor profiles,  $G$  their corresponding time series, and  $E$  is the model residuals and the scaled residuals are minimized. The model uses a least-squares method to iteratively minimize the object function  $Q$ , defined as the sum of the squared residuals ( $e_{ij}$ ) weighted by their respective uncertainties ( $\sigma_{ij}$ ):

$$Q=\sum_{i=1}^m \sum_{j=1}^n \left( \frac{e_{ij}}{\sigma_{ij}} \right)^2 \quad (S2)$$

The PMF analysis was performed using the ME2, which allows for a comprehensive exploration of rotational ambiguity in the solution space (Canonaco et al., 2013). ME2 is used to introduce a priori information as an additional model input, constraining one or more factor profiles to a predetermined range ( $a$  value):

$$f_{j,\text{solution}} = f_j \pm a \times f_j \quad (\text{S3})$$

where  $f$  refers to a row of the matrix  $F$ ,  $j$  indicates the  $m/z$  of the ions, and the  $a$  value (from 0 to 1 with a step of 0.1) determines the extent to which the output profiles can differ from the model inputs.

The optimal number was selected by the discrimination of the tracers and the spectrum pattern of each source. Hydrocarbon-like OA (HOA) was dominated by alkyl ions with prominent ion fragments at  $C_nH^+_{2n-1}$  and  $C_nH^+_{2n+1}$  ( $m/z$  41, 43, 55, 57, 69, 71, 83, and 85) in the spectra (Elser et al., 2016). Biomass-burning OA (BBOA) was identified by significant contributions from  $m/z$  60 (mainly  $C_2H_4O_2^+$ ) and  $m/z$  73 (mainly  $C_3H_5O_2^+$ ), they were the fragments of levoglucosan and mannosan emitted from incomplete biomass burning (Alfarra et al., 2007). Coal-combustion OA (CCOA) was characterized by unsaturated hydrocarbon ion fragments such as PAH-related ion fragments (i.e.,  $m/z$  77, 91, and 115) (Sun et al., 2016). Oxygenated OA (OOA) was distinguished by the prominent signal of  $m/z$  43 (mainly  $C_2H_3O^+$ ) and  $m/z$  44 (mainly  $CO_2^+$ ) (Ng et al., 2011). Aqueous-phase oxidized OA (aqSOA) also had high correlation with  $m/z$  43 and  $m/z$  44, while it might show a significantly higher  $m/z$  29 (mainly  $CHO^+$ ) signal than other OA factors (Zhao et al., 2019; Zhong et al., 2021).

In this study, we performed the free PMF runs from 3 to 6 factors. The discrete spectra were more likely to reasonable results when  $N = 4, 5$ , and 6 (Fig. S4–S6). When  $N = 4$ , OOA1, OOA2, HOA and BBOA+CCOA were resolved. In

BBOA+CCOA, the signals of levoglucosan ( $m/z$  60) and PAH-related ( $m/z$  91 and 115) ion fragments were obvious in the spectrum, suggesting BBOA was mixed with CCOA. In the  $N = 5$  solutions, BBOA, CCOA, HOA, OOA, and aqSOA were resolved. These solutions were more reasonable than the  $N = 4$  solutions because of the high relative humidity conditions during the sampling period. However, both CCOA and HOA exhibited significant signals at  $m/z$  60, suggesting potential mixing with BBOA. When  $N = 6$ , the resolved OOA profiles were less evident than those in  $N = 5$ . Additionally,  $Q/Q_{\text{expected}}$  showed that the solution with 5 factors was the most interpretable results (Fig. S7).

It should be noted that there was still a mix among POA factors in the five factors PMF solutions (Fig. S5). Initially, we tried to constrain COA by using COA profile in ME2 to identify if COA factor could be resolved from the OA sources. The COA was tried to constrain by using the profile from Elser et al. (2016). The restriction method ME2 was used to minimize PMF rotational ambiguity by the  $a$ -values from 0 to 1 with a step of 0.1 based on the reasonable result of PMF solutions. However, a large amount of blank values were shown, indicating COA was absent during the campaign. Then, all the combinations (BBOA and HOA, BBOA and CCOA, HOA and CCOA) were freely optimized by 11  $a$ -values variables, respectively.

Here, BBOA was constrained by using the BBOA profile of Zhong et al. (2020), which was a clean BBOA profile from free PMF result. HOA and CCOA were constrained by using the HOA profile of Ng et al. (2011) and CCOA profile of Wang et al. (2017) to avoid mix with BBOA, respectively. Compared with previous research (Zhong et al., 2021), the optimal  $a$ -values solutions and ion fragments tracers were

used to optimize the results, achieving effective minimization of  $m/z$  60 signals in both HOA and CCOA profiles. In order to minimize the mix of BBOA from HOA and CCOA, a threshold of  $m/z$  60 (the major ion tracer of BBOA) for the maximal fractional contribution was set as 0.006 (mean +  $2\sigma$ ) for HOA and CCOA, respectively (Ng et al., 2011; Wang et al., 2017).

(1) When BBOA and HOA were freely combined in increments of 0.1 (from 0 to 1), the fractional contribution of  $m/z$  60 in HOA ranged from 0.0017 to 0.0189. When the  $a$ -values of BBOA and HOA were set to ranges of 0–1 and 0–0.6, respectively, the fractional contribution of  $m/z$  60 in HOA remained below 0.006. However, when the  $a$ -values of HOA extended to 0.7–1, the corresponding  $m/z$  60 fractional contributions exceeded 0.006 (Fig. S8a). Therefore, only solutions with HOA  $a$ -values below 0.7 were retained, while all BBOA solutions with  $a$ -values ranging from 0 to 1 were retained.

(2) BBOA and CCOA were also freely combined by 11  $a$ -values variables according to the  $a$ -values method in (1). When the  $a$ -values of CCOA were higher than 0.9, all fractional contributions of  $m/z$  60 in CCOA were above 0.006 (Fig. S8b). In contrast, at CCOA  $a$ -values below 0.9, all the corresponding  $m/z$  60 contributions in CCOA remained below this threshold ( $< 0.006$ ). Therefore, the BBOA solutions with  $a$ -values ranging from 0 to 1 were retained, but all solutions with CCOA  $a$ -values exceeded 0.9 should be eliminated.

(3) After HOA and CCOA were constrained, the other unconstrained factors had a similar pattern with previously reported profiles. Based on the results from (1) and (2), we selected  $a$ -values ranges of 0–0.6 for HOA and 0–0.8 for CCOA for the factors combination. As shown in Fig. S8c, when the  $a$ -values of CCOA exceeded 0.7,

most of the corresponding  $m/z$  60 fractional contributions were above 0.006. Therefore, both the HOA and CCOA solutions with  $a$ -values from 0.7 to 1 were deleted based on the aforementioned criteria. Overall, 20 PMF solutions were retained and their average was used as the final result (Fig. S9)."

3. For the absorption values, the authors often refer to measurements of  $Abs_{BrC}$ , but it is never clearly stated that this value is calculated from  $Abs - Abs_{BC}$ , where the latter is calculated based on assumptions stated at lines 183-184. A more thorough description of this is needed in the manuscript or in the SI, as it currently missing.

**Response:** Thanks for the reviewer's comment. We have clearly stated that the  $Abs$  was divided into BC and BrC absorption ( $Abs_{BC}$  and  $Abs_{BrC}$ ) and the  $Abs$  value was the sum of  $Abs_{BC}$  and  $Abs_{BrC}$  at different wavelengths. Then,  $Abs_{BrC}$  value is calculated from  $Abs - Abs_{BC}$ . Additionally, a more thorough description of this is needed in the SI Text S2. It has been revised accordingly in the revised manuscript, which reads "The  $Abs_{\lambda}$  was divided into BC and brown carbon (BrC, a group of colored OA compounds) absorption ( $Abs_{\lambda,BC}$  and  $Abs_{\lambda,BrC}$ ) ( $Abs_{\lambda}=Abs_{\lambda,BC}+Abs_{\lambda,BrC}$ ) and characterized by the absorption Ångström exponents (AAE) (Laskin et al., 2015). Here,  $Abs_{\lambda}$  was determined dependent  $BC_{\lambda}$  mass concentrations ( $Abs_{\lambda}=BC_{\lambda}\times MAC_{\lambda}$ ). We assumed the mass absorption cross-section of aerosols ( $MAC_{\lambda}$ ) were 18.47, 14.54, 13.14, 11.58, 10.35, 7.77, and 7.19  $m^2 g^{-1}$  at 370, 470, 520, 590, 660, 880, and 950 nm, respectively (Drinovec et al., 2015; Zhu et al., 2017). Here, we assumed that  $Abs_{880}$  was sole from BC, then the following formula was used to determine  $Abs_{\lambda,BC}$  values:  $Abs_{\lambda,BC}=Abs_{880}\times(880/\lambda)^{-AAE_{BC}}$  (Drinovec et al., 2015; Kirchstetter and Novakov, 2004; Moosmüller et al., 2009; Qin et al., 2018; Zhu et al., 2017). The AAE of BC ( $AAE_{BC}$ ) value was obtained from the equality:

$AAE_{BC} = -\log(Abs_{880}/Abs_{950}) \div \log(880/950)$  (Wang et al., 2021). A detailed description of  $Abs_{\lambda,BC}$  and  $Abs_{\lambda,BrC}$  calculations is provided in SI Text S3. Additionally,  $Abs_{\lambda,BrC}$  was caused by primary and secondary BrC light absorption ( $Abs_{\lambda,BrC,pri}$  and  $Abs_{\lambda,BrC,sec}$ ). The  $Abs_{\lambda,BrC,sec}$  value was calculated by a minimum R-squared (MRS) method at each wavelength (Wang et al., 2019; Wu and Yu, 2016; Wu et al., 2024). The detailed information of MRS method and  $Abs_{\lambda,BrC,sec}$  estimation is provided in SI Text S3." (Lines 214-231).

### "Text S3. Estimation of BC and BrC Absorption

Aerosol light absorption ( $Abs_{\lambda}$ ) was caused by black carbon (BC) ( $Abs_{\lambda,BC}$ ) and brown carbon (BrC) ( $Abs_{\lambda,BrC}$ ). In this study, the  $Abs_{\lambda}$  value was measured in real time by AE33 (Magee Scientific) at seven wavelengths (i.e., 370, 470, 520, 590, 660, 880, and 950 nm) (Drinovec et al., 2015). Previous research indicated that  $Abs_{\lambda}$  measured by Aethalometer was influenced by the scattering effects of quartz filters and nonlinear loading effects (Coen et al., 2010). This study implemented real-time corrections for loading effects based on the parallel measurements of attenuation values (ATN1 and ATN2) from the AE33 (Drinovec et al., 2015).

Using equations (S5) and (S6), BC concentrations and the coefficient  $k$  for eliminating filter scattering effects were calculated based on the measured ATN1 and ATN2 values, along with the mass concentrations of BC1 and BC2. The  $Abs_{\lambda}$  was derived from BC concentrations at different wavelengths and the mass absorption cross-section of aerosols ( $MAC_{\lambda}$ ) according to equation (S7) (Zhu et al., 2017). Then,  $Abs_{\lambda,BC}$  and  $Abs_{\lambda,BrC}$  were calculated based on the equations (S8), (S9), and (S10) (Qin et al., 2018; Wang et al., 2021; Zhu et al., 2017).

$$BC1 = BC \times (1 - k \times ATN1) \quad (S5)$$



$$BC_2 = BC \times (1 - k \times ATN_2) \quad (S6)$$

$$Abs_{\lambda} = BC_{\lambda} \times MAC_{\lambda} \quad (S7)$$

$$Abs_{BrC, \lambda_1} = Abs_{\lambda_1} - Abs_{BC, \lambda_1} \quad (S8)$$

$$Abs_{BC, \lambda_1} = Abs_{\lambda_2} \times (\lambda_2 / \lambda_1)^{AAE_{BC}} \quad (S9)$$

$$AAE_{BC} = -\log(Abs_{880} / Abs_{950}) \div \log(880 / 950) \quad (S10)$$

where  $Abs_{\lambda_2}$  represented the Abs at 880 nm. We assumed that  $Abs_{BrC}$  was considered negligible at 880 nm, and  $MAC_{\lambda}$  values were 18.47, 14.54, 13.14, 11.58, 10.35, 7.77, and  $7.19 \text{ m}^2 \text{ g}^{-1}$  at 370, 470, 520, 590, 660, 880, and 950 nm, respectively (Drinovec et al., 2015; Qin et al., 2018; Zhu et al., 2017).

$Abs_{\lambda, BrC}$  was caused by primary BrC ( $Abs_{\lambda, BrC, pri}$ ) and secondary BrC ( $Abs_{\lambda, BrC, sec}$ ). The  $Abs_{\lambda, BrC, sec}$  value was estimated by a minimum R-squared (MRS) method at each wavelength developed from the BC-tracer method (Wang et al., 2019; Wu and Yu, 2016) ..."

4. The manuscript contains a lot of redundant sentences and grammatically incorrect sentences that perturb the reading. I have tried listing most of these issues below in the “minor comments and technical corrections” section.

**Response:** Thanks for the reviewer's comment and suggestion. We have provided a point-to-point response to the following minor comments and technical corrections. Additionally, all sentences have been grammatically verified and improved in the revised manuscript.

**Minor comments and technical corrections:**

Lines 40-42: I would suggest changing to present tenses when you make a general statement not necessarily related to one particular study. This comment is valid elsewhere in the manuscript (e.g., lines 49, 76, 85, etc.). Please check.

**Response:** It has been revised accordingly in the revised manuscript.

Lines 52-56: This sentence is very difficult to understand as it is. Can you maybe split it in two and reformulate it?

**Response:** Thanks for the reviewer's suggestion. It has been revised accordingly in the revised manuscript, which reads "An increasing number of studies pointed toward aqSOA as a major SOA could form in fogs, clouds, and aerosol water (Ervens et al., 2011; Ortiz-Montalvo et al., 2012; Tan et al., 2012; Xu et al., 2022). And the oxygenated VOCs (OVOCs) with large water-soluble and low Henry's constant (i.e., methylglyoxal and glycolaldehyde) are the important aqSOA precursors (Ortiz-Montalvo et al., 2012; Tan et al., 2012)." (**Lines 52-56**).

Line 94: What do you mean by “typical city in SCB”? This comment is also valid for the statement at line 106. For the general reader, it is not clear what “typical” means in that sense. Is it typical in terms of aerosol pollution, in terms of population, in terms of meteorological conditions?

**Response:** Thanks for the reviewer's comment. It has been revised accordingly in the revised manuscript, which reads "Here a time-of-flight aerosol chemical speciation monitor (ToF-ACSM) and a series of collocated instruments were used to characterize aqSOA dynamic evolution from biomass burning under real ambient conditions in a typical city with relatively serious air pollution in SCB from October 21 to November

23, 2022." (Lines 105-108), "An intensive field campaign on the chemical and physical properties of aerosol was conducted at a measurement site in a city affected by severe aerosol pollution (Yongchuan, 29°21'25" N, 105°54'6" E) from October 21 to November 23, 2022. This is a typical urban site surrounded by restaurants, shopping malls, and residential buildings, and the site is located in a parallel ridge-and-valley area between two megacities in SCB (Chongqing center and Chengdu) (Fig. S1). It was primarily influenced by multiple local emissions from traffic (arterial roads to the east 600 m and west 300 m) and a variety of residential sources (i.e., biomass burning and fossil fuel combustion)." (Lines 117-125).

Lines 104-105: Please rephrase (e.g., "... was conducted at a measurement site in a city affected by severe aerosol pollution").

**Response:** It has been revised accordingly in the revised manuscript, which reads "An intensive field campaign on the chemical and physical properties of aerosol was conducted at a measurement site in a city affected by severe aerosol pollution (Yongchuan, 29°21'25" N, 105°54'6" E) from October 21 to November 23, 2022." (Lines 117-119).

Line 111: What do you mean by "interfered by neighboring buildings"? Do you mean in terms of dynamics or emission sources?

**Response:** It has been revised accordingly in the revised manuscript, which reads "There was no interference of dynamics from neighboring buildings, and measurements at the site helped understand the characteristics of haze pollution dynamic evolution." (Lines 125-127).

Lines 120-125: I would suggest moving this part to Sect. 2.3.1 where it discussed in more details at lines 146-150.

**Response:** Thanks for the reviewer's suggestion. We have moved this part to Sect. 2.3.1, which reads "The ionization efficiency (IE) and relative ionization efficiency (RIEs) were regularly calibrated using a scanning mobility particle sizer with a differential mobility analyzer (SMPS 3081A, TSI) and a condensation particle counter (CPC 3775, TSI). The comprehensive overview of the operation and calibration procedures of ToF-ACSM can be found in Bao et al. (2023)." (**Lines 156-161**).

Line 121: Please change to "... were regularly calibrated using a scanning..."

**Response:** It has been revised accordingly in the revised manuscript.

Line 124: Please change "could" to "can".

**Response:** It has been revised accordingly in the revised manuscript.

Line 127: The Aethalometer AE33 measures equivalent black carbon, not black carbon. Please clarify that in the text.

**Response:** It has been revised accordingly in the revised manuscript, which reads "A seven-wavelength Aethalometer (AE33, Magee Scientific) was used to measure the aerosol light absorption ( $Abs_{\lambda}$ ) and equivalent black carbon ( $BC_{\lambda}$ ) mass concentrations in real time at 370, 470, 520, 590, 660, 880, and 950 nm." (**Lines 136-138**).

Line 135: Please change "could" to "can".

**Response:** It has been revised accordingly in the revised manuscript.

Line 157: Please spell out the “SoFi” acronym (i.e., Source Finder).

**Response:** It has been revised accordingly in the revised manuscript.

Line 163: I would suggest adding the reference of Paatero and Hopke (2003), as they originally presented this downweighting scheme.

**Response:** Thanks for the reviewer's suggestion. It has been revised accordingly in the revised manuscript, which reads "The ions data with signal-to-noise (S/N) lower than 0.2 were discarded, and those S/N from 0.2–2 were downweighted by a factor of 2 (Bao et al., 2023; Paatero and Hopke 2003)." **(Lines 189-191).**

Lines 183-184: The formulation “Abs<sub>880</sub> was sole from BC” is not clear. Do you mean that it is assumed that, at 880 nm, only BC is contributing? Please rephrase.

**Response:** It has been revised accordingly in the revised manuscript, which reads "Here, we assumed that Abs<sub>880</sub> was sole from BC, then the following formula was used to determine Abs <sub>$\lambda$ ,BC</sub> values:  $Abs_{\lambda,BC} = Abs_{880} \times (880/\lambda)^{-AAE_{BC}}$  (Drinovec et al., 2015; Kirchstetter and Novakov, 2004; Moosmüller et al., 2009; Qin et al., 2018; Zhu et al., 2017)." **(Lines 220-223).**

Lines 195-198: If I understand correctly, the constant a-e are wavelength-dependent right? If so, can you clarify that?

**Response:** Thanks for the reviewer's comment. Yes, the constant a-e are wavelength-dependent. It has been revised accordingly in the revised manuscript and the Abs of five OA factors at each wavelength obtained by the MLR method were shown in Table S1, which reads "... the a–e were constants, used to optimize the Abs <sub>$\lambda$</sub>  of each OA component, and equivalent to MAC values at each wavelength (i.e., a–e at 370

nm represented  $MAC_{370,OOA}$ ,  $MAC_{370,BBOA}$ ,  $MAC_{370,CCOA}$ ,  $MAC_{370,aqSOA}$ , and  $MAC_{370,HOA}$ , respectively). " (Lines 236-239).

Line 209: Similar to a comment I made above, please use present or present perfect tense when referring to a figure shown in the main or SI (i.e., "... during the campaign is shown in Fig. 1."). This comment is valid elsewhere in the manuscript. Please check.

**Response:** It has been revised accordingly in the revised manuscript.

Lines 216-217: There is an alternate use of "Org" and "OA" in this manuscript. While I understand that "Org" refers to the species measured by the ACSM, and "OA" is more general, the distinction is not always clear. I would suggest sticking to one or another.

**Response:** It has been revised accordingly in the revised manuscript.

Lines 220-222: As it is written, giving a range of mass concentrations does not justify that the "OA composition were substantially different". Either refer to Fig. 2 in this sentence, or move this sentence to the next paragraph and merge it with the sentence where you actually discuss the differences in chemical composition.

**Response:** Thanks for the reviewer's comment. We have moved and revised this sentence to the next paragraph, which reads "During PP, the mass concentrations of BC+NR-PM<sub>2.5</sub> and OA were  $102.3 \pm 26.9$  and  $57.4 \pm 22.5 \mu\text{g m}^{-3}$ , 2.5 and 3.1 times that during CP, respectively. As shown in Fig. 2, the PM<sub>2.5</sub> species were substantially different in the PP and CP." (Lines 270-273). Additionally, the substantially different of OA composition was pointed out in the revised manuscript, which reads "It should be noted that the contributions of BBOA and aqSOA to OA increased from CP

(31.7% and 12.6%) to PP (38.6% and 14.1%), while CCOA, HOA, and OOA contributions decreased." (Lines 298-300).

Line 227: Since you refer to the method as “PMF” before, stick to “PMF” and not “PMF-ME2”.

**Response:** It has been revised accordingly in the revised manuscript.

Line 229: How can you tell for sure it is  $\text{C}_2\text{H}_4\text{O}_2^+$  contributing at m/z 60, when you only have unit mass resolution with the ACSM? There are other ion fragments at this m/z. Please change to m/z 60, since you also just mention m/z 73 just after. You can add the ion fragment that is most likely contributing in parenthesis. This is valid elsewhere in the manuscript (e.g., line 251, 447, 448).

**Response:** It has been revised accordingly in the revised manuscript.

Line 229: This is the first time you mention a “correlation”. Please define the metric you use. You mention “ $r^2$ ”, is it a Pearson correlation squared, a Spearman correlation squared, a coefficient of determination?

**Response:** Thanks for the reviewer's suggestion. Here,  $r^2$  is a Pearson correlation squared. It has been revised accordingly in the revised manuscript.

Line 228-234: For someone who is not an absolute expert in PMF, this whole paragraph gives very little information on the justification of the choice of factor. At least give references for why the correlation mentioned justify the factor names.

**Response:** Thanks for the reviewer's comment. It has been revised accordingly in the revised manuscript, which reads "Here, five OA factors were identified by the PMF model with detailed information in SI Text S1, and the mass spectrum of these factors

is shown in Fig. S9. HOA mass spectrum was characterized by alkyl fragment ion series at  $C_nH^{+}_{2n-1}$  and  $C_nH^{+}_{2n+1}$  (i.e.,  $m/z$  41, 43, 55, and 57), they are common characteristics of primary combustion emissions (Elser et al., 2016; Lanz et al., 2007). BBOA was identified by the high signal of  $m/z$  60 (mainly  $C_2H_4O_2^{+}$ ) and  $m/z$  73 (mainly  $C_3H_5O_2^{+}$ ), they are the fragments of levoglucosan and mannosan emitted from incomplete biomass burning (Alfarra et al., 2007). CCOA had high correlation with the unsaturated hydrocarbon ion fragments such as PAH-related ion fragments (i.e.,  $m/z$  77, 91, 115), emitted from traditional coal combustion (Sun et al., 2016a). OOA was distinguished by the prominent signal of  $m/z$  44 (mainly  $CO_2^{+}$ ) and highly correlated with the oxygenated ions (Ng et al., 2011b). aqSOA also had high correlation with the the oxygenated ions (i.e,  $m/z$  43 (mainly  $C_2H_3O^{+}$ ) and  $m/z$  44). Moreover, The mass spectrum of aqSOA showed a significantly higher  $m/z$  29 (mainly  $CHO^{+}$ ) signal than other OA factors, consistent with those reported in the previous studies (Sun et al., 2016a; Xu et al., 2019; Zhao et al., 2019; Zhong et al., 2021). Moreover, BBOA showed significant correlations with  $m/z$  60 (mainly  $C_2H_4O_2^{+}$ ) and  $m/z$  73 (Pearson's  $r^2$  ( $r^2$ ) = 0.85, 0.80,  $p < 0.001$ ); CCOA was strongly correlated with Chl and  $m/z$  115 ( $r^2$  = 0.56, 0.48,  $p < 0.001$ ); HOA was correlated with  $NO_2$  and  $m/z$  41 ( $r^2$  = 0.47, 0.59,  $p < 0.001$ ); OOA and aqSOA were significantly correlated with  $NO_3$ ,  $NH_4$  ( $r^2$  = 0.77, 0.75,  $p < 0.001$ ) and  $SO_4$ , ALWC ( $r^2$  = 0.67, 0.85,  $p < 0.001$ ), respectively (Fig. S10). These results highlighted the result of five OA factors was reasonable." **(Lines 275-297).**

Figure 2: The legends are very confusing, as the elements of the legend in (a) also apply for (b) and vice-versa. The left y-axis are generally weird, can you make them start from zero and have constant increments?



**Response:** Thanks for the reviewer's suggestion. It has been revised accordingly in the revised manuscript.

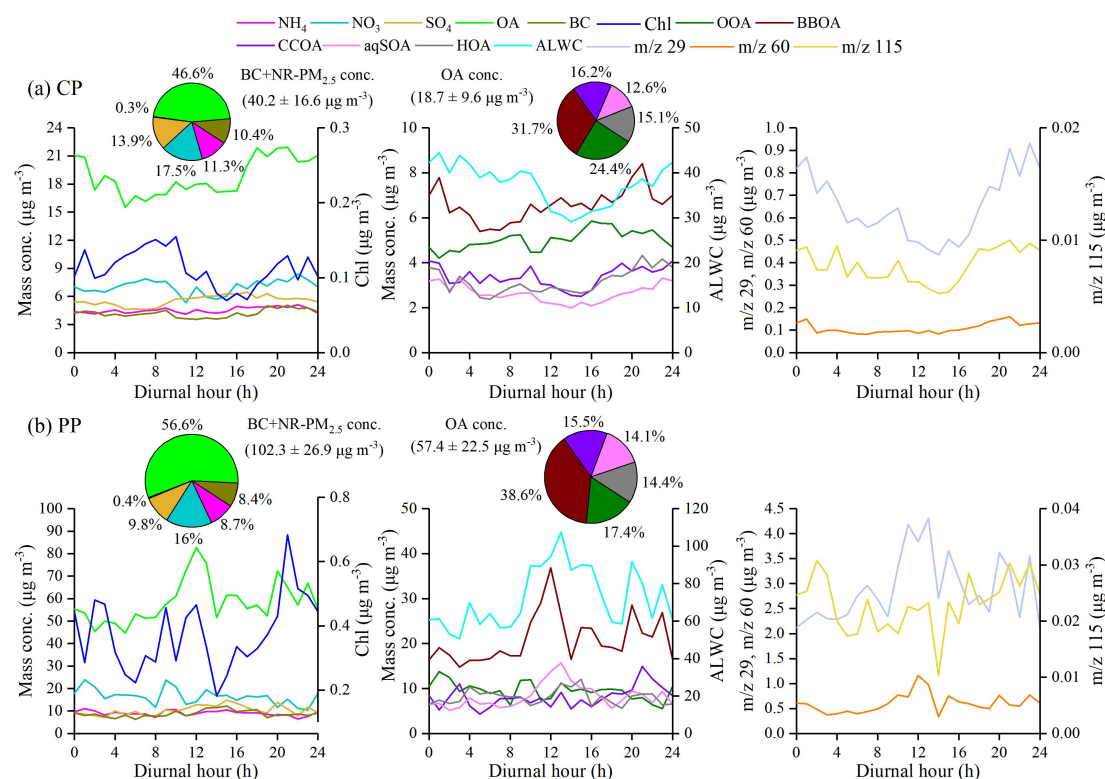

Lines 242-245: Please reformulate this sentence, it is grammatically incorrect.

**Response:** It has been revised accordingly in the revised manuscript, which reads "Compared with CP, the obvious diurnal variation of OA concentration was exhibited during PP. As shown in Fig. 2, the OA concentration peak ( $82.7 \mu\text{g m}^{-3}$ ) was observed at 12:00 local time (LT) in the daytime during PP, while observed at 21:00 LT at night during CP." (Lines 306-309).

Line 257-258: Do you rather mean here the chemical processing from BBOA to aqSOA? Since they don't peak at the same time the argument was more that one leads to the other, not that there are processed at the same time.

**Response:** It has been revised accordingly in the revised manuscript, which reads "...supporting that ALWC might play a significant role in the chemical processing of aqSOA formation from BBOA during PP." (Lines 321-322).

Line 261-265: This sentence is a repetition of the sentence at the end of the last paragraph. Also, you now mention fog events, but you mentioned before that the aqueous processing was related to ALWC, so aerosol water, not fog water. Regarding the last point, you mention this difference at lines 305-308, so you could move it here.

**Response:** Thanks for the reviewer's suggestion. It has been revised accordingly in the revised manuscript, which reads "Additionally, considerable aqSOA in the daytime during PP might be related to the high aerosol water and BBOA emissions in the harvest season – autumn – in SCB (Bao et al., 2023; Chen et al., 2017; Chen et al., 2019; Tao et al., 2014). Based on the direct observation of aqSOA, Gilardoni et al. (2016) also found that aqSOA such as guaiacol dimer ( $C_{14}H_{14}O_4^+$ ) could be formed from aged biomass-burning emissions at both in fog water and in wet aerosol, especially under high ALWC conditions." (Lines 331-337).

Lines 281-283: Please reformulate this sentence, it is grammatically incorrect.

**Response:** Thanks for the reviewer's suggestion. It has been revised accordingly in the revised manuscript, which reads "Fig. 3 shows the strong correlation between the mass fraction (%) of aqSOA in total  $PM_{2.5}$  and ALWC during the campaign ( $r^2 = 0.64$ ,  $p < 0.001$ ). The contribution of aqSOA increased with the increase of  $f_{29}$  values (normalized mass spectrum signal at  $m/z$  29)." (Lines 352-355).

Figure 3: Is the  $f_{29}$  coming from the ambient ACSM data? This distinction was never made and it is a bit confusing, as you sometimes also refer to the  $f_{29}$  for each individual

factor separately (which are constant values and not variables). Also, why is the x-axis the percentage of aqSOA to BC+NR-PM<sub>2.5</sub> and not the percentage of aqSOA to total PMF OA as shown in Fig. 1d.

**Response:** In Fig. 3, the  $f_{29}$  (normalized mass spectrum signal at m/z 29) came from the mass spectral matrix of OA for m/z 10–120, which are variables, and the time resolution of  $f_{29}$  was 1 h for the continuous measurements. As the reviewer pointed out, the  $f_{29}$  values for each individual factor (which are constant values) are sometimes used separately in the manuscript. These values are derived from the mass spectra of six OA factors during the campaign (Fig. S9). In order to analyze the direct impacts of ALWC and aqSOA on PM<sub>2.5</sub> formation, we conducted a correlation analysis using the percentage of aqSOA to BC+NR-PM<sub>2.5</sub> as the x-axis and ALWC as the y-axis.

Line 288: What do you mean by “located in a similar region”? Which figure are you referring to here?

**Response:** Thanks for the reviewer's comment. It has been revised accordingly in the revised manuscript, which reads "Moreover, both aqSOA concentrations and  $f_{29}$  were well correlated with ALWC ( $r^2 = 0.85, 0.73, p < 0.001$ ) (Fig. 3). During the campaign, the average value of the oxygen-to-carbon ratio (O:C) of aqSOA factor (0.85) was 2.7 times that (0.31) of BBOA factor. However, the similar hydrogen-to-carbon ratio (H:C) values of aqSOA factor and BBOA factor were observed (1.74 and 1.81, respectively), indicating that a hydrogen atom might be replaced by a OH moiety (Lim et al., 2010; Ng et al., 2011a). These results were similar to aqSOA observed in Italy and Beijing (Gilardoni et al., 2016; Zhao et al., 2019)." (Lines 35-365).

Lines 292-296: The correlations mentioned are not shown on any figure, please add “(not shown)” in the sentence.

**Response:** It has been revised accordingly in the revised manuscript.

Line 295: Change “production” to “produced”.

**Response:** It has been revised accordingly in the revised manuscript.

Lines 301-305: Please reformulate this sentence, it is grammatically incorrect.

**Response:** It has been revised accordingly in the revised manuscript, which reads "It should be noted that only aqSOA concentrations were enhancement under high ALWC conditions ( $> 100 \mu\text{g m}^{-3}$ ). It is likely because more water-soluble organic species (i.e., glyoxal and methylglyoxal) were formed, that were further oxidized to form aqSOA via aqueous-phase reactions in aerosol liquid water (Carlton et al., 2007; Ervens et al., 2011; Tan et al., 2012)." **(Lines 380-384).**

Line 311: This is the first time you make a distinction between POA and SOA. What exactly do you consider as POA and SOA for your PMF factors? You need to make this clear here as the reader doesn't know what you are referring to otherwise. At line 361, you explain what you mean by “SOA” but still not for POA.

**Response:** It has been revised accordingly in the revised manuscript, which reads "...although POA (BBOA+CCOA+HOA) and SOA (OOA+aqSOA) contributions were fairly constant across different ALWC levels (58–68% and 32–42%)." **(Line 387-389).** Moreover, the POA and SOA for the PMF factors in this study have been defined in the revised manuscript, which reads "Finally, five OA factors with function of the rotational parameter ( $f_{\text{peak}} = 0$ ) were identified, including three POA factors (i.e., BBOA, coal-combustion OA (CCOA), and hydrocarbon-like OA (HOA)) and two SOA factors (i.e., OOA and aqSOA) (Fig. S9 and S10)." **(Lines 191-195).**

Lines 341-342: This sentence feels like a repetition of what was said just before with Fig. 4.

**Response:** Thanks for the reviewer's suggestion. It has been revised accordingly in the revised manuscript, which reads "The correlation  $r^2$  between aqSOA and BBOA concentrations was higher during PP (0.64) than that during CP (0.54) ( $p < 0.001$ ) (Fig. 5a and c). Though aqSOA and BBOA concentrations increased with the increase of ALWC during CP and PP, the correlations between ALWC and aqSOA or BBOA concentrations were relatively stronger during PP than that during CP ( $p < 0.001$ )."  
(Lines 418-422).

Lines 342-345: The comparison is difficult to make, as you have much less datapoints during polluted periods. Can you check the statistical significance of your statement of “stronger positive correlation”?

**Response:** It has been revised accordingly in the revised manuscript, which reads "The correlation  $r^2$  between aqSOA and BBOA concentrations was higher during PP (0.64) than that during CP (0.54) ( $p < 0.001$ ) (Fig. 5a and c). Though aqSOA and BBOA concentrations increased with the increase of ALWC during CP and PP, the correlations between ALWC and aqSOA or BBOA concentrations were relatively stronger during PP than that during CP ( $p < 0.001$ )."  
(Lines 418-422).

Line 345: The correlations mentioned here are different than the ones given at lines 254-255 for the same variables. Why are they different? If these are supposed to be the same correlations, why repeat it here?

**Response:** These correlations are supposed to be the same correlations. It has been revised accordingly in the revised manuscript.

The correlations mentioned in **lines 317-319** "Additionally, the correlation between ALWC and aqSOA concentrations ( $r^2 = 0.86$ ,  $p < 0.001$ ) was stronger than BBOA concentrations ( $r^2 = 0.58$ ,  $p < 0.001$ )..." indicated the ALWC played a more significant role in the aqSOA formation than BBOA during PP. In order to identify the coupling relationship between aqSOA and BBOA concentrations under different PM<sub>2.5</sub> pollution levels, We repeated it and compared the differences between CP and PP in **lines 419-422** "Though aqSOA and BBOA concentrations increased with the increase of ALWC during CP and PP, the correlations between ALWC and aqSOA or BBOA concentrations were relatively stronger during PP than that during CP ( $p < 0.001$ )."

Lines 345-347: Such statements that BBOA leads to aqSOA formation are repeated in almost every paragraph and it feels redundant (e.g., lines 290-291, 326-328, 350-352, 406-407), can you remove it in some places to avoid redundancy?

**Response:** It has been revised accordingly in the revised manuscript.

Lines 347-348: Figure 5b and d don't show any correlation between f<sub>29</sub> and aqSOA, at least not using circle size for f<sub>29</sub>.

**Response:** Thanks for the reviewer's suggestion. We have revised accordingly in the revised manuscript and showed the correlations between  $f_{29}$  and aqSOA in Figure 5b and d.

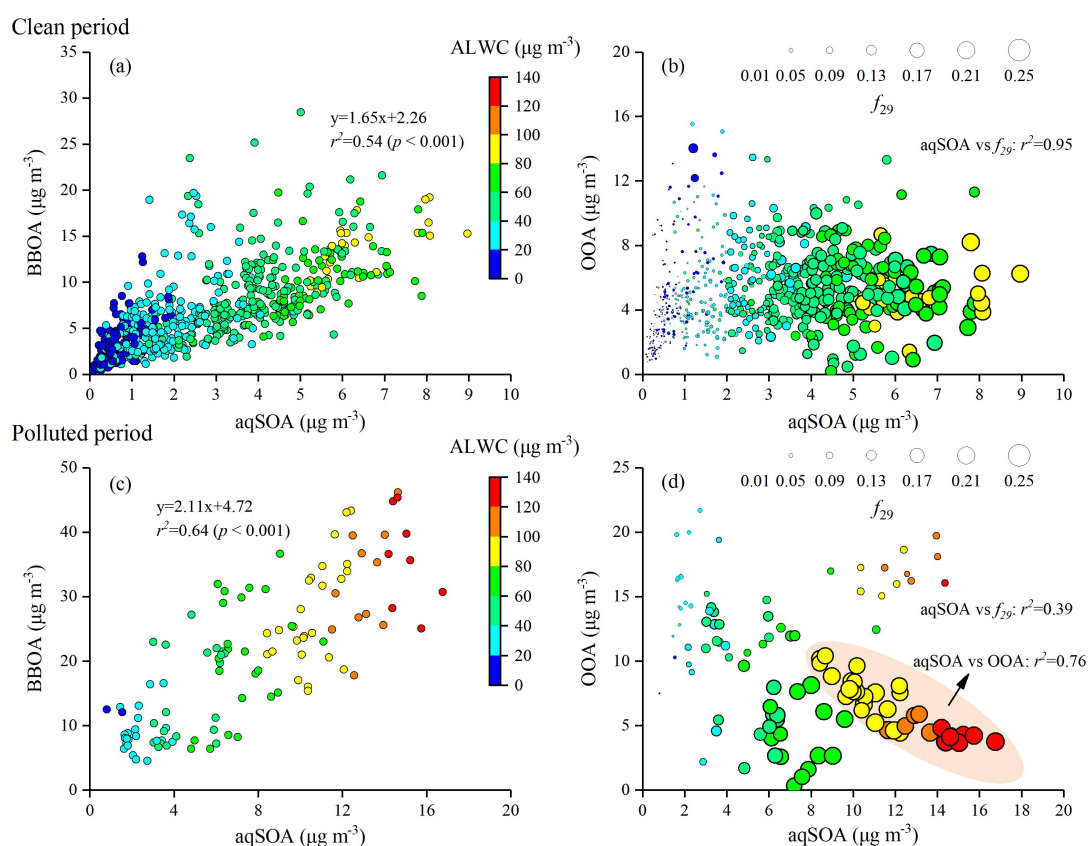

Lines 348-350: If you mention that the correlation is “strong” can you give numbers?

It also seems to be based on a subset of a subset of data, which doesn’t seem so fair.

**Response:** Thanks for the reviewer's comment. The correlation between aqSOA and OOA concentrations during PP has been shown in Figure 5d. We have explained the reason for selecting data under the conditions of  $\text{ALWC} > 80 \mu\text{g m}^{-3}$  and  $f_{29} > 0.15$  to analyze the correlation between OOA and aqSOA concentrations in this study. It has been revised accordingly in the revised manuscript, which reads "A few data points with high aqSOA and OOA concentrations had low  $f_{29}$  values (0.071–0.102) in Fig. 5d, while the average value of  $f_{44}$  (normalized mass spectrum signal at  $m/z$  44) of these data points ( $0.103 \pm 0.024$ ) was 1.3 times that of all data points ( $0.080 \pm 0.035$ ) during PP. It was likely due to the formation of more-oxidized OOA under high ALWC values ( $> 80 \mu\text{g m}^{-3}$ ) in this study (Xu et al., 2017). Previous research found

that the  $f_{29}$  values of polyols and species with non-acid OH groups from biomass-burning emissions were lower than 0.15 (Canagaratna et al., 2015; Gilardoni et al., 2016; Zhao et al., 2014). Moreover, the mass fraction of aqSOA showed a stable increasing trend and remained high levels (from 18% to 22%) at  $ALWC > 80 \mu\text{g m}^{-3}$ , which was associated with a corresponding decrease in OOA (from 15% to 10%) (Fig. 4b). Compared with OOA ( $p > 0.1$ ), the aqSOA concentrations showed strong positive correlation with ALWC ( $r^2 = 0.73$ ,  $p < 0.001$ ) when  $ALWC > 80 \mu\text{g m}^{-3}$  during PP. In contrast, ALWC showed the weak correlations with aqSOA and OOA concentrations during CP ( $p > 0.1$ ). It should be noted that a strong anticorrelation between aqSOA and OOA concentrations was observed during PP at  $ALWC > 80 \mu\text{g m}^{-3}$  when  $f_{29} > 0.15$  ( $r^2 = 0.76$ ,  $p < 0.001$ ), but not during CP ( $p > 0.1$ ) (Fig. 5b and d). These results indicated that the aqSOA formation was more intensive than OOA at high ALWC levels during PP." (Lines 423-441).

Lines 355-359: Please reformulate this sentence, it is grammatically incorrect.

**Response:** Thanks for the reviewer's suggestion. It has been revised accordingly in the revised manuscript, which reads "Additionally, m/z's 44 and 43 are usually from different functional groups and the ratio changes as a function of atmospheric aging. The triangle plot of  $f_{44}$  versus  $f_{43}$  has been widely used to characterize OA evolution, and  $f_{44}$  versus  $f_{60}$  is commonly used to investigate the aging trend of BBOA (Ortega et al., 2013; Paglione et al., 2020; Xu et al., 2017; Xu et al., 2019)." (Lines 445-450).

Figure 6: The colors and the legend of the figure are very confusing. Especially because the color bar for ALWC has the same colors as for the PMF factors. It is also not clear what are the data points from other studies and what are the data points from this study since the legend only describe the squares but not the circles.



**Response:** Thanks for the reviewer's comment. It has been revised accordingly in the revised manuscript, which reads "**Figure 6.** Triangle plots of **(a, c)**  $f_{44}$  (normalized mass spectrum signal at  $m/z$  44) versus  $f_{43}$  (normalized mass spectrum signal at  $m/z$  43), and **(b, d)**  $f_{44}$  versus  $f_{60}$  (normalized mass spectrum signal at  $m/z$  60) colored by ALWC (circles) during clean period and polluted period. The dashed lines in **(a)** and **(c)** were derived from Ng et al. (2010) and used to follow the aging of OA components in the atmosphere. The background space ( $f_{60} < 0.003$ ) without biomass burning influence was also shown by the grey shaded area. The background value of secondary aged OA (brown dashed line) and the black dashed lines characterising the aging of BBOA in **(b)** and **(d)** were derived from Cubison et al. (2011). The data points (squares) included the measurements in this study (bordered in red) and previous research (Bao et al., 2023; Gilardoni et al., 2016; Kim et al., 2019; Ng et al., 2011a; Paglione et al., 2020; Xu et al., 2015; Xu et al., 2017; Xu et al., 2019; Zhao et al., 2017; Zhao et al., 2019).  $f_{43}$  (mainly  $C_2H_3O^+$ ) is a tracer for POA and fresh SOA.  $f_{44}$  is a proxy of the OA oxygenation degree and used as a tracer for aged SOA.  $f_{60}$  is a proxy of anhydrosugars emitted from biomass burning." **(Lines 507-519).**

Lines 361-363: The conclusion of this sentence is too far-fetched. How does a larger  $f_{44}$  for SOA compared to POA justifies the statement that aging of OOA leads to formation of aqSOA?

**Response:** Thanks for the reviewer's comment. It has been revised accordingly in the revised manuscript, which reads "However, the  $f_{44}$  of SOA factors (i.e., OOA and aqSOA) (0.118 and 0.117) were observably higher than POA factors, showing the freshly oxidized properties of SOA. Meanwhile,  $f_{44}$  of aqSOA was close to that observed in fogs (Gilardoni et al., 2016; Kim et al., 2019), highlighting the presence

of aqueous-phase reactions in this study. The relative abundance of  $m/z$  45 (mainly  $\text{HCO}_2^+$ ), a tracer ion for carboxylic acids, was higher in the aqSOA spectra than in the OOA spectrum (Fig. S9). It was consistent with previous research which found that aqueous-phase reactions were important sources of oxygenated organic compounds, including organic acids (Ervens et al., 2011; Kim et al., 2019; McNeill, 2015; Sun et al., 2010; Yu et al., 2014)." (Lines 452-461).

Line 365: Do you mean Fig. 6b or maybe 6d, instead of Fig. 4c?

**Response:** It has been revised accordingly in the revised manuscript, which reads "Fig. 6b shows BBOA and aqSOA with higher  $f_{60}$  values (0.019 and 0.011) than CCOA (0.009) and HOA (0.008)." (Lines 461-462).

Lines 365-367: Is 0.011 “much higher” than 0.009 or 0.008?

**Response:** It has been revised accordingly in the revised manuscript, which reads "Fig. 6b shows BBOA and aqSOA with higher  $f_{60}$  values (0.019 and 0.011) than CCOA (0.009) and HOA (0.008)." (Lines 461-462).

Line 367: Insert comma after 0.002.

**Response:** It has been revised accordingly in the revised manuscript.

Lines 369-371: The information in parenthesis “ $f_{44}$  (representation of aged OA)” and “ $f_{60}$  (presence of anhydrosugars)” is important to understand Fig. 6. This information should come much before when introducing Fig. 6 (i.e., between line 353 and 359).

**Response:** Thanks for the reviewer's suggestion. It has been revised accordingly in the revised manuscript, which reads "Previous research demonstrated that  $f_{44}$  (representation of aged OA) could be used as a tracer of aged SOA,  $f_{43}$  (normalized

mass spectrum signal at  $m/z$  43) as a tracer of POA and fresh SOA, and  $f_{60}$  (presence of anhydrosugars) as a tracer of BBOA (Cubison et al., 2011; Ng et al., 2010)." (Lines 442-445).

Lines 373-376: You mention "previous research" but don't cite papers. Also, the second part of the sentence after the comma is unrelated to the first part. I.e., the fact that the observations are within the triangle space does not imply that POA are fresh and aqSOA are more oxidized and formed from BBOA.

**Response:** Thanks for the reviewer's comment. It has been revised accordingly in the revised manuscript, which reads "These results were consistent with previous research and most of the observation data were within the triangle space (Bao et al., 2023; Kim et al., 2019; Paglione et al., 2020)." (Lines 476-478).

Lines 379-382: What are the numbers in parenthesis after CP? Please reformulate the sentence, at present it is not possible to understand it.

**Response:** It has been revised accordingly in the revised manuscript, which reads "Compared with CP ( $r^2 = 0.17$ , slope =  $-0.53$ ),  $f_{44}$  showed a more significant increase as the decreasing of  $f_{43}$  with higher  $r^2$  value ( $0.70$ ) and the regression slope of  $f_{44}$  versus  $f_{43}$  ( $-1.09$ ) was closer to  $-1$  during PP." (Lines 481-484).

Lines 383-387: I would argue that not "some" points are outside the bottom boundary of the triangle, but most are. Also, please rephrase the sentence, it is not grammatically correct.

**Response:** Thanks for the reviewer's suggestion. It has been revised accordingly in the revised manuscript, which reads "It should be noted that the points of  $f_{44}$  versus  $f_{43}$  were inside the upper boundary of the triangle region, and most points were outside

the bottom boundary of the triangle region during PP. These results suggested that less oxidized SOA were formed via aqueous-phase reactions instead of photochemical reactions during PP (Kim et al., 2019; Zhao et al., 2019)." (Lines 485-489).

Lines 387-389: In general, it also just seems that there is much less ALWC during CP (which makes sense since aerosol concentrations are lower during CP). I am not convinced that this is an argument to justify the sentence that follows.

**Response:** The following sentence has been removed in the revised manuscript.

Lines 389-391: Please reformulate this sentence, it is grammatically incorrect.

**Response:** This sentence has been removed to avoid redundancy in the revised manuscript.

Lines 394-398: This sentence is already in the caption of Fig. 6. No need to duplicate the information, remove it here.

**Response:** It has been revised accordingly in the revised manuscript.

Lines 398-399: This sentence should go in the caption and be remove here.

**Response:** It has been revised accordingly in the revised manuscript.

Lines 399-401: It is not clear if you are referring to the PMF factors or the datapoints. If you are referring to the PMF factors then this sentence is in contradiction with the sentence at lines 367-368, where it is said that OOA has an  $f_{60}$  below the 0.003 threshold.

**Response:** Thanks for the reviewer's comment. It has been revised accordingly in the revised manuscript, which reads "Except for several points, the  $f_{60}$  values were

ubiquitously higher than 0.003, and most points fell in the triangular region, suggesting the contribution of biomass burning to OA." (Lines 494-496).

Lines 401-403: The part “while the mean  $f_{44}$  value was significantly higher” was already stated at lines 377-378.

**Response:** It has been revised accordingly in the revised manuscript, which reads "During PP, the  $f_{60}$  values ranging from 0.005 to 0.019 ( $0.010 \pm 0.004$ ) were similar with CP (from 0.004 to 0.019,  $0.010 \pm 0.003$ )." (Lines 496-498).

Lines 403-405: I am bit skeptical about this sentence since the schematic space is indeed a schematic, so you cannot quantify how many of your datapoints are within this region. Perhaps formulating it differently would help.

**Response:** Thanks for the reviewer's suggestion. It has been revised accordingly in the revised manuscript, which reads "The correlation  $r^2$  between  $f_{44}$  and  $f_{60}$  was higher during PP (0.72) than that during CP (0.31) ( $p < 0.001$ ). Moreover, compared with all data points during PP, those in the schematic space of aged BBOA showed relatively higher ALWC, a pattern that differed from observations during CP." (Lines 498-501).

Lines 425-427: Are you making a general statement or an observation based on your data? Also, please reformulate the sentence, it is grammatically incorrect.

**Response:** It has been revised accordingly in the revised manuscript, which reads "Previous research indicated that OA from fresh and aged biomass-burning emissions, which exhibited absorption properties across UV to Vis range with significantly higher AAE value than BC, might contribute to a net positive radiative forcing (Laskin et al., 2015)." (Lines 521-524).

Line 431: Please remove “As shown in Fig. S6”. The average value of  $Abs_{370,BrC}$  is not shown in Fig. S6 and cannot be guessed since BrC is split between primary and secondary contribution.

**Response:** It has been revised accordingly in the revised manuscript.

Lines 434-436: The distinction between POA and primary brown carbon is unclear here. These are not the same thing and should not be interchanged.

**Response:** Thanks for the reviewer's suggestion. It has been revised accordingly in the revised manuscript, which reads "The  $Abs_{\lambda,BrC,pri}$  and  $Abs_{\lambda,BrC,sec}$  accounted for 56.8%–72.5% and 27.5%–43.2% of  $Abs_{\lambda,BrC}$  from 370 nm to 660 nm respectively, indicating primary emissions were the main contributors to BrC absorption (Fig. S12)." (Lines 530-533).

Line 438: Change “Here we showed” to “Hereafter, we show”.

**Response:** It has been revised accordingly in the revised manuscript.

Lines 443-446: Where do the values in parenthesis come from?

**Response:** It has been revised accordingly in the revised manuscript, which reads "As described in section 2.3.3, the Abs of five OA factors at each wavelength were obtained by the MLR method (Table S1). Compared with CCOA ( $Abs_{370,CCOA}$ ), HOA ( $Abs_{370,HOA}$ ), and OOA ( $Abs_{370,OOA}$ ) (11.5%, 9.1%, and 11.1%), the Abs at 370 nm calculated for BBOA ( $Abs_{370,BBOA}$ ) and aqSOA ( $Abs_{370,aqSOA}$ ) showed higher contributions (51.9% and 16.4%) to  $Abs_{370,BrC}$ , consistent with the higher MAC values (Fig. S14)." (Lines 539-544).

**Table S1.** The Abs values and contributions of five OA factors to  $Abs_{BrC}$  at different

wavelengths during the campaign.

| OA factors | Parameter                                | 370 nm | 470 nm | 520 nm | 590 nm | 660 nm |
|------------|------------------------------------------|--------|--------|--------|--------|--------|
| BBOA       | Abs <sub>BBOA</sub> (Mm <sup>-1</sup> )  | 19.4   | 6.0    | 3.8    | 2.2    | 1.2    |
|            | Contribution (%)                         | 51.9   | 44.5   | 40.8   | 43.4   | 39.1   |
| OOA        | Abs <sub>OOA</sub> (Mm <sup>-1</sup> )   | 4.1    | 2.1    | 1.5    | 0.8    | 0.5    |
|            | Contribution (%)                         | 11.1   | 16.5   | 16.9   | 16.6   | 16.6   |
| aqSOA      | Abs <sub>aqSOA</sub> (Mm <sup>-1</sup> ) | 6.2    | 2.3    | 1.6    | 0.9    | 0.7    |
|            | Contribution (%)                         | 16.4   | 21.4   | 20.8   | 22.1   | 26.7   |
| CCOA       | Abs <sub>CCOA</sub> (Mm <sup>-1</sup> )  | 4.3    | 1.0    | 0.7    | 0.4    | 0.2    |
|            | Contribution (%)                         | 11.5   | 7.8    | 7.5    | 7.4    | 7.5    |
| HOA        | Abs <sub>HOA</sub> (Mm <sup>-1</sup> )   | 3.4    | 1.3    | 1.3    | 0.5    | 0.3    |
|            | Contribution (%)                         | 9.1    | 9.8    | 14.0   | 10.5   | 10.1   |

Figure 7: Are the “MAC” values the a-e constants in the MLR method? If yes, then please explain this in the text clearly. Same comment for lines 459-460.

**Response:** Yes. The "MAC" values are the a–e constants in the MLR method. It has been revised in the revised manuscript, which reads "...the a–e were constants, used to optimize the Abs<sub>λ</sub> of each OA component, and equivalent to MAC values at each wavelength (i.e., a–e at 370 nm represented MAC<sub>370,OOA</sub>, MAC<sub>370,BBOA</sub>, MAC<sub>370,CCOA</sub>, MAC<sub>370,aqSOA</sub>, and MAC<sub>370,HOA</sub>, respectively)." (**Lines 236-239**). We also have revised in **lines 558-559** "The MAC values of the five resolved OA components equivalent to the a–e values in the MLR method at different wavelengths were shown in Fig. S14."

Lines 452-454: Please reformulate this sentence, it is grammatically incorrect.

**Response:** It has been revised accordingly in the revised manuscript, which reads "Compared with other OA factors (except BBOA), the contribution of Abs<sub>370,aqSOA</sub> to Abs<sub>370,BrC</sub> was relatively higher (Table S1), when the correlation between Abs<sub>370,BrC</sub>

and aqSOA concentrations was also stronger. These results might be related to the aqSOA formed from the aged BBOA via aqueous-phase reactions." (Lines 550-553).

Lines 462-465: Please reformulate this sentence, it is grammatically incorrect.

**Response:** It has been revised accordingly in the revised manuscript, which reads "Previous research found that the MAC of BBOA at 365 nm was twice that of SOA, which was associated with the water-soluble BrC (Lorenzo et al., 2017; Washenfelder et al., 2015)." (Lines 562-564).

Lines 465-467: What the values in parenthesis? Are they from the literature? Have you calculated them? If so why mentioning at wavelength 370-660 nm while it is later introduced at 370-880 nm at line 505.

**Response:** The values in parenthesis represented the fitted AAE values of OA factors, that were calculated by a power-law fitting of the absorption coefficient for these OA factors from 370 nm to 660 nm in this study. More details concerning this approach were described in the literature (Qin et al., 2018; Wang et al., 2019). Here, we assumed that  $Abs_{880}$  was sole from BC, and Abs can be divided into BC and BrC absorption at 370, 470, 520, 590, and 660 nm. Thus, AAE values of OA factors were calculated from 370 nm to 660 nm (i.e.,  $AAE_{370-660,aqSOA}$ ), while AAE values of aerosols were calculated from 370 nm to 880 nm ( $AAE_{370-880}$ ). It has been revised accordingly in the revised manuscript, which reads "The AAE values of OA factors, calculated by a power-law fitting of Abs for these OA factors from 370 nm to 660 nm (Qin et al., 2018; Wang et al., 2019), were shown in Fig. S14. It should be noted that aqSOA had the lowest  $AAE_{370-660,aqSOA}$  value (3.54), while BBOA has the highest  $AAE_{370-660,BBOA}$  value (4.93)." (Lines 564-568).



Lines 467-469: Same comment as for lines 443-445, where do the numbers come from?

**Response:** The values were calculated by a power-law fitting of the absorption coefficient for OA factors from 370 nm to 660 nm in this study. More details concerning this approach were described in the literature (Qin et al., 2018; Wang et al., 2019). We have revised in the revised manuscript: "The AAE values of OA factors, calculated by a power-law fitting of Abs for these OA factors from 370 nm to 660 nm (Qin et al., 2018; Wang et al., 2019), were shown in Fig. S14." (Lines 564-566).

Lines 472-482: This entire paragraph is based on discussion of an SI figure (S9). I would suggest moving this figure to the main. Eventually, Fig. 7 could go in the SI as it does not provide much information and is not discussed much.

**Response:** It has been revised accordingly in the revised manuscript.

Line 487: Change "but no OOA" to "this was not the case for OOA".

**Response:** It has been revised accordingly in the revised manuscript.

Lines 488-489: Please reformulate this sentence, it is grammatically incorrect.

**Response:** It has been revised accordingly in the revised manuscript, which reads "The slope of the linear regression (3.50) between aqSOA mass concentrations and  $\text{Abs}_{370, \text{BrC}, \text{sec}}$  was higher than OOA (Fig. S16), so was the MAC values of aqSOA across UV to Vis range (Fig. S14)." (Lines 589-591).

Line 496: The relation between  $\text{Abs}_{370, \text{BrC}, \text{pri}}/\Delta\text{CO}$  looks more like a cloud of point to me.

**Response:** It has been revised accordingly in the revised manuscript, which reads "Fig. 8 shows that the values of  $\text{Abs}_{370,\text{BrC}_{\text{sec}}}/\Delta\text{CO}$  increased with the increases of aqSOA and ALWC concentrations from 17:00 to 03:00 LT ( $r^2 = 0.63, 0.57, p < 0.001$ ), while  $\text{Abs}_{370,\text{BrC}_{\text{pri}}}/\Delta\text{CO}$  slightly decreased with the increases of BBOA and m/z 60 concentrations ( $r^2 = 0.35, 0.33, p < 0.001$ ).". (Lines 596-599).

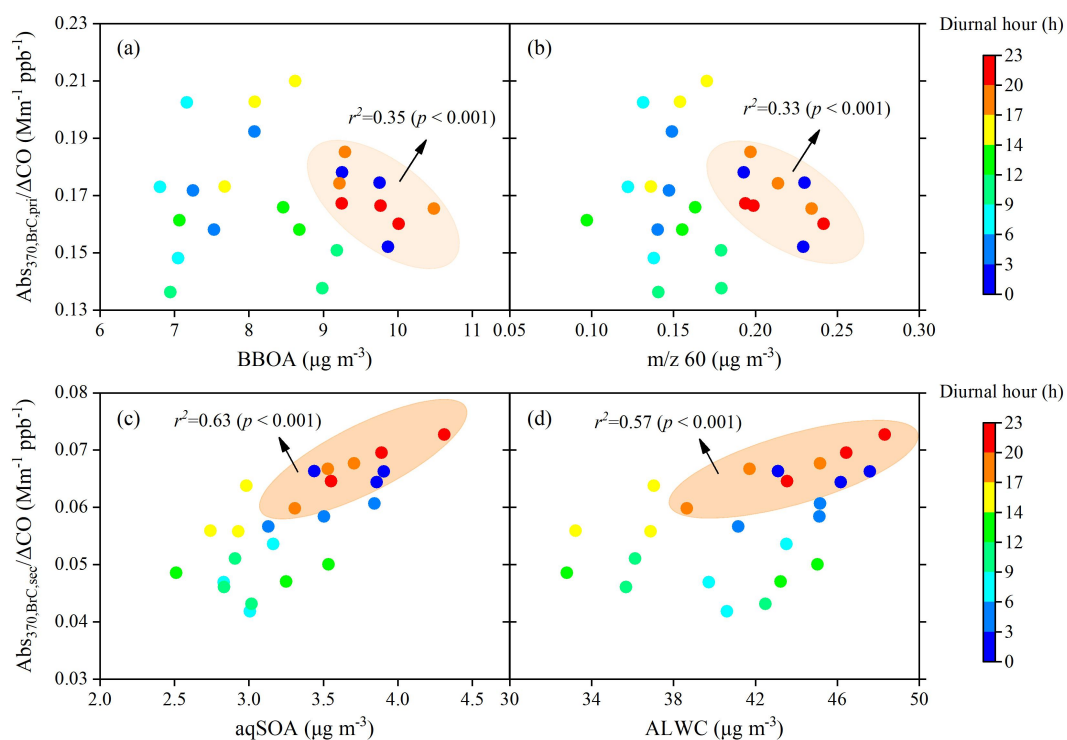

Line 501: Change “should” to “could”.

**Response:** It has been revised accordingly in the revised manuscript.

Line 508: I would define a correlation of 0.49 as strong. Even though it remains unclear if  $r^2$  is really the correlation or the coefficient of determination.

**Response:** Yes. Here,  $r^2$  is a Pearson correlation squared, which has been defined at line 291-292 "Moreover, BBOA showed significant correlations with m/z 60 (mainly C<sub>2</sub>H<sub>4</sub>O<sub>2</sub><sup>+</sup>) and m/z 73 (Pearson's  $r^2$  ( $r^2$ ) = 0.85, 0.80,  $p < 0.001$ )...".

Lines 513-515: I might be mistaken but isn't this relation circular? Since AAE is calculated based on a log relation of Abs values and BC is linearly dependent on Abs, don't we expect the relation we see on Fig. 9?

**Response:** Thanks for the reviewer's comment. While AAE was calculated based on a power-law fitting of absorption values (Qin et al., 2018; Wang et al., 2019), BC concentration is linearly related to  $Abs_{BC}$ . However, OA concentration does not necessarily show a linear relationship with  $Abs_{BC}$ . The mixing state of BC and OA, which depends on combustion conditions, can also influence AAE. Previous studies (Lu et al., 2015; Saleh et al., 2014) have shown that biomass-burning emissions can affect absorption properties, which is reflected in the relationship between AAE and the BC-to-OA ratio. The observed relationship in Fig. 9b is thus not circular but reflects the effect of biomass-burning emissions on aerosol absorption properties. The parameterized curve in our study (black curve) aligns with previous research (red curve) using similar wavelength ranges (370–880 nm) (Lu et al., 2015).

It has been revised accordingly in the revised manuscript, which reads "AAE was calculated using a power-law fitting of aerosol absorption values (Qin et al., 2018; Wang et al., 2019). While BC concentration is linearly dependent on  $Abs_{BC}$ , OA concentration does not follow the same pattern with  $Abs_{BC}$ . The mixing state of BC and OA, influenced by combustion conditions, can also affect AAE. Previous studies have shown that biomass-burning emissions can impact absorption properties, which is reflected in the relationship between AAE and the BC-to-OA ratio (a measure of the combustion conditions) (Lu et al., 2015; Saleh et al., 2014). Thus, the relationship observed in Fig. 9b reflected the influence of biomass-burning emissions during the campaign, and the parameterized curve in this study (black) was consistent with prior

research (red) using wavelengths from 370 nm to 880 nm (Lu et al., 2015)." (**Lines 621-631**).

Lines 526-529: It appreciated to have a concluding statement here, but feels redundant since a conclusion is provided just a few lines after.

**Response:** Thanks for the reviewer's comment. We have revised and moved it to **lines 670-676** "In conclusion, our results revealed the aqSOA formation and brownness from aged BBOA via aqueous-phase reactions and highlighted the importance of aqSOA on aerosol pollution and absorption in the Sichuan Basin, China. Brown aqSOA originating from biomass-burning emissions was an important player in air quality budget and climate forcing balance worldwide. And it should be taken into account in air quality and climate models for a correct description of the global OA budget and its climate-relevant optical properties."

Line 540: I would call this section "Conclusion" and not "Implications" as the content of the section is about summarizing and repeating the content of the manuscript.

**Response:** Thanks for the reviewer's suggestion. It has been revised accordingly in the revised manuscript.

Line 541-542: This sentence is a copy-paste of the first sentence in the intro. Please reformulate or delete.

**Response:** We have deleted this sentence in the revised manuscript.

Line 545: What do you mean by "an increasing laboratory research"?

**Response:** This sentence has been removed in the revised manuscript.

Lines 551-552: You mention that your study highlighted the importance of aqSOA on air quality. However, this is the first time in the paper that air quality is mentioned.

**Response:** Thanks for the reviewer's comment. We have revised and moved it to **lines 670-672** "In conclusion, our results revealed the aqSOA formation and brownness from aged BBOA via aqueous-phase reactions and highlighted the importance of aqSOA on aerosol pollution and absorption in the Sichuan Basin, China."

Lines 552-557: As shown in Fig. 7, isn't it BBOA that has the strongest absorption across UV to visible, rather than aqSOA?

**Response:** Thanks for the reviewer's comment. BBOA has the strongest absorption across UV to visible rather than aqSOA. It has been revised accordingly in the revised manuscript, which reads "The aqSOA formed from aged biomass-burning emissions significantly contributed to the BrC budget and showed stronger absorption across ultraviolet to visible range than other OA components (except BBOA)." (**Lines 662-664**).

Lines 558-559: This sentence is redundant.

**Response:** It has been revised accordingly in the revised manuscript.

Line 560: Saying "considerable" implies that you can quantify it. However, in this manuscript the amount of aqSOA that originates from BBOA is not quantified. Please rephrase.

**Response:** It has been revised accordingly in the revised manuscript.

Line 564: Not sure how Fig. 6 justifies that the formation of aqSOA was through aqueous-phase reactions instead of photo-chemical reactions.

**Response:** Thanks for the reviewer's comment. In the revised manuscript, we have confirmed that aqueous-phase reactions were an important source of aqSOA in **lines 450-461**. Additionally, we further demonstrated that less oxidized SOA during PP was primarily formed through aqueous-phase rather than photochemical reactions in **lines 479-491**.

"As shown in Fig. 6, the bottom region of the triangle was dominated by BBOA, CCOA, and HOA with low  $f_{44}$  (0.040, 0.017, and 0.016, respectively) in this study, indicating that they were freshly emitted and less oxidized. However, the  $f_{44}$  of SOA factors (i.e., OOA and aqSOA) (0.118 and 0.117) were observably higher than POA factors, showing the freshly oxidized properties of SOA. Meanwhile,  $f_{44}$  of aqSOA was close to that observed in fogs (Gillardoni et al., 2016; Kim et al., 2019), highlighting the presence of aqueous-phase reactions in this study. The relative abundance of m/z 45 (mainly  $\text{HCO}_2^+$ ), a tracer ion for carboxylic acids, was higher in the aqSOA spectra than in the OOA spectrum (Fig. S9). It was consistent with previous research which found that aqueous-phase reactions were important sources of oxygenated organic compounds, including organic acids (Ervens et al., 2011; Kim et al., 2019; McNeill, 2015; Sun et al., 2010; Yu et al., 2014)." (**Lines 450-461**).

"During PP, the  $f_{44}$  values ranging from 0.022 to 0.140 ( $0.080 \pm 0.035$ ) were significantly higher than that during CP (0.021–0.150,  $0.064 \pm 0.019$ ) ( $p < 0.001$ ), while the  $f_{43}$  value was slightly lower with an average of  $0.062 \pm 0.027$ . Compared with CP ( $r^2 = 0.17$ , slope =  $-0.53$ ),  $f_{44}$  showed a more significant increase as the decreasing of  $f_{43}$  with higher  $r^2$  value (0.70) and the regression slope of  $f_{44}$  versus  $f_{43}$  ( $-1.09$ ) was closer to  $-1$  during PP. This indicated that more aged SOA existed in the atmosphere during PP (Fig. 6a and c). It should be noted that the points of  $f_{44}$  versus

$f_{43}$  were inside the upper boundary of the triangle region, and most points were outside the bottom boundary of the triangle region during PP. These results suggested that less oxidized SOA were formed via aqueous-phase reactions instead of photo-chemical reactions during PP (Kim et al., 2019; Zhao et al., 2019). Moreover, these points outside the bottom boundary of the triangle region with higher  $f_{44}$  ( $> 0.05$ ) and lower  $f_{43}$  ( $< 0.06$ ) showed relatively higher ALWC during PP, but not during CP." (Lines 479-491).

Lines 571-574: Please reformulate this sentence, it is grammatically incorrect.

**Response:** Thanks for the reviewer's comment. It has been revised accordingly in the revised manuscript, which reads "Higher values of  $AAE_{370-880}$  and  $MAC_{\lambda,aqSOA}$  reinforced that aqSOA formation from aged biomass-burning emissions via aqueous-phase reactions had stronger absorption than that via photo-chemically reactions." (Lines 667-669).

Lines 575-577: Please reformulate this sentence, it is grammatically incorrect. Seems like part of the sentence is missing.

**Response:** Thanks for the reviewer's comment. It has been revised accordingly in the revised manuscript, which reads "In conclusion, our results revealed the aqSOA formation and brownness from aged BBOA via aqueous-phase reactions and highlighted the importance of aqSOA on aerosol pollution and absorption in the Sichuan Basin, China." (Lines 670-672).

## References

- Alfarra, M. R., Prévôt, A. S. H., Szidat, S., Sandradewi, J., Sandradewi, S., Lanz, V. A., Schreiber, D., Mohr, M., and Baltensperger, U.: Identification of the Mass Spectral Signature of Organic Aerosols from Wood Burning Emissions, *Environ. Sci. Technol.*, 41, 5770–5777, <https://doi.org/10.1021/es062289b>, 2007.
- Bao, Z. E., Zhang, X. Y., Li, Q., Zhou, J. W., Shi, G. M., Zhou, L., Yang, F. M., Xie, S. D., Zhang, D., Zhai, C. Z., Li, Z. L., Peng, C., and Chen, Y.: Measurement report: Intensive biomass burning emissions and rapid nitrate formation drive severe haze formation in the Sichuan Basin, China – insights from aerosol mass spectrometry, *Atmos. Chem. Phys.*, 23, 1147–1167, <https://doi.org/10.5194/acp-23-1147-2023>, 2023.
- Canagaratna, M. R., Jimenez, J. L., Kroll, J. H., Chen, Q., Kessler, S. H., Massoli, P., Hildebrandt Ruiz, L., Fortner, E., Williams, L. R., Wilson, K. R., Surratt, J. D., Donahue, N. M., Jayne, J. T., and Worsnop, D. R.: Elemental ratio measurements of organic compounds using aerosol mass spectrometry: characterization, improved calibration, and implications, *Atmos. Chem. Phys.*, 15, 253–272, <https://doi.org/10.5194/acp-15-253-2015>, 2015.
- Canonaco, F., Crippa, M., Slowik, J. G., Baltensperger, U., and Prévôt, A. S. H.: SoFi, an IGOR-based interface for the efficient use of the generalized multilinear engine (ME-2) for the source apportionment: ME-2 application to aerosol mass spectrometer data, *Atmos. Meas. Tech.*, 6, 3649–3661, <https://doi.org/10.5194/amt-6-3649-2013>, 2013.
- Carlton, A. G., Turpin, B. J., Altieri, K. E., Seitzinger, S., Reff, A., Lim, H. J., and Ervens, B.: Atmospheric oxalic acid and SOA production from glyoxal: results of



- aqueous photooxidation experiments, *Atmos. Environ.*, 41, 7588–7602, <https://doi.org/10.1016/j.atmosenv.2007.05.035>, 2007.
- Chen, Y., Tian, M., Huang, R. J., Shi, G. M., Wang, H. B., Peng, C., Cao, J. J., Wang, Q. Y., Zhang, S. M., Guo, D. M., Zhang, L. Y., and Yang, F. M.: Characterization of urban amine-containing particles in southwestern China: seasonal variation, source, and processing, *Atmos. Chem. Phys.*, 19, 3245–3255, <https://doi.org/10.5194/acp-19-3245-2019>, 2019.
- Chen, Y., Xie, S. D., Luo, B., and Zhai, C. Z.: Particulate pollution in urban Chongqing of southwest China: Historical trends of variation, chemical characteristics and source apportionment, *Sci. Total Environ.*, 584–585, 523–534, <https://doi.org/10.1016/j.scitotenv.2017.01.060>, 2017.
- Coen, M. C., Weingartner, E., Apituley, A., Ceburnis, D., Fierz-Schmidhauser, R., Flentje, H., Henzing, J. S., Jennings, S. G., Moerman, M., Petzold, A., Schmid, O., and Baltensperger, U.: Minimizing light absorption measurement artifacts of the Aethalometer: Evaluation of five correction algorithms, *Atmos. Meas. Tech.*, 3, 457–474, <https://doi.org/10.5194/amt-3-457-2010>, 2010.
- Cubison, M. J., Ortega, A. M., Hayes, P. L., Farmer, D. K., Day, D., Lechner, M. J., Brune, W. H., Apel, E., Diskin, G. S., Fisher, J. A., Fuelberg, H. E., Hecobian, A., Knapp, D. J., Mikoviny, T., Riemer, D., Sachse, G. W., Sessions, W., Weber, R. J., Weinheimer, A. J., Wisthaler, A., and Jimenez, J. L.: Effects of aging on organic aerosol from open biomass burning smoke in aircraft and laboratory studies, *Atmos. Chem. Phys.*, 11, 12049–12064, <https://doi.org/10.5194/acp-11-12049-2011>, 2011.
- Drinovec, L., Močnik, G., Zotter, P., Prévôt, A. S. H., Ruckstuhl, C., Coz, E., Rupakheti, M., Sciare, J., Müller, T., Wiedensohler, A., and Hansen, A. D. A.: The "dual-spot" Aethalometer: an improved measurement of aerosol black carbon with

- real-time loading compensation, *Atmos. Meas. Tech.*, 8, 1965–1979, <https://doi.org/10.5194/amt-8-1965-2015>, 2015.
- Elser, M., Huang, R. J., Wolf, R., Slowik, J. G., Wang, Q. Y., Canonaco, F., Li, G. H., Bozzetti, C., Daellenbach, K. R., Huang, Y., Zhang, R. J., Li, Z. Q., Cao, J. J., Baltensperger, U., El-Haddad, I., and Prévôt, A. S. H.: New insights into PM<sub>2.5</sub> chemical composition and sources in two major cities in China during extreme haze events using aerosol mass spectrometry, *Atmos. Chem. Phys.*, 16, 3207–3225, <https://doi.org/10.5194/acp-16-3207-2016>, 2016.
- Ervens, B., Turpin, B. J., and Weber, R. J.: Secondary organic aerosol formation in cloud droplets and aqueous particles (aqSOA): a review of laboratory, field and model studies, *Atmos. Chem. Phys.*, 11, 11069–11102, <https://doi.org/10.5194/acp-11-11069-2011>, 2011.
- Gilardoni, S., Massoli, P., Paglione, M., Giulianelli, L., Carbone, C., Rinaldi, M., Decesari, S., Sandrini, S., Costabile, F., Gobbi, G. P., Pietrogrande, M. C., Visentin, M., Scotto, F., Fuzzi, S., and Facchini, M. C.: Direct observation of aqueous secondary organic aerosol from biomass-burning emissions, *Proc. Natl. Acad. Sci. USA*, 113, 10013–10018, <https://doi.org/10.1073/pnas.1602212113>, 2016.
- Kim, H., Collier, S., Ge, X. L., Xu, J. Z., Sun, Y. L., Jiang, W. Q., Wang, Y. L., Herckes, P., and Zhang, Q.: Chemical processing of water-soluble species and formation of secondary organic aerosol in fogs, *Atmos. Environ.*, 200, 158–166, <https://doi.org/10.1016/j.atmosenv.2018.11.062>, 2019.
- Kirchstetter, T. W. and Novakov T.: Evidence that the spectral dependence of light absorption by aerosols is affected by organic carbon, *J. Geophys. Res.*, 109, D21208, <https://doi.org/10.1029/2004JD004999>, 2004.

- Lanz, V. A., Alfarra, M. R., Baltensperger, U., Buchmann, B., Hueglin, C., and Prévôt, A. S. H.: Source apportionment of submicron organic aerosols at an urban site by factor analytical modelling of aerosol mass spectra, *Atmos. Chem. Phys.*, 7, 1503–1522, doi:10.5194/acp-7-1503-2007, 2007.
- Laskin, A., Laskin, J., and Nizkorodov, S. A.: Chemistry of atmospheric brown carbon, *Chem. Rev.*, 115, 4335–4382, <https://doi.org/10.1021/cr5006167>, 2015.
- Lim, Y. B., Tan, Y., Perri, M. J., Seitzinger, S. P., and Turpin, B. J.: Aqueous chemistry and its role in secondary organic aerosol (SOA) formation, *Atmos. Chem. Phys.*, 10, 10521–10539, <https://doi.org/10.5194/acp-10-10521-2010>, 2010.
- Lorenzo, R. A. D., Washenfelder, R. A., Attwood, A. R., Guo, H., Xu, L., Ng, N. L., Weber, R. J., Baumann, K., Edgerton, E., and Young, C. J.: Molecular-Size-Separated Brown Carbon Absorption for Biomass-Burning Aerosol at Multiple Field Sites, *Environ. Sci. Technol.*, 51, 3128–3137, <https://doi.org/10.1021/acs.est.6b06160>, 2017.
- Lu, Z., Streets, D. G., Winijkul, E., Yan, F., Chen, Y., Bond, T. C., Feng, Y., Dubey, M. K., Liu, S., Pinto, J. P., and Carmichael, G. R.: Light absorption properties and radiative effects of primary organic aerosol emissions, *Environ. Sci. Technol.*, 49, 4868–4877, <https://doi.org/10.1021/acs.est.5b00211>, 2015.
- McNeill, V. F.: Aqueous Organic Chemistry in the Atmosphere: Sources and Chemical Processing of Organic Aerosols, *Environ. Sci. Technol.*, 49, 1237–1244, <https://doi.org/10.1021/es5043707>, 2015.
- Moosmüller, H., Chakrabarty, R. K., and Arnott, W. P.: Aerosol light absorption and its measurement: A review, *J. Quant. Spectrosc. Ra.*, 110, 844–878, <https://doi.org/10.1016/j.jqsrt.2009.02.035>, 2009.

- Ng, N. L., Canagaratna, M. R., Jimenez, J. L., Chhabra, P. S., Seinfeld, J. H., and Worsnop, D. R.: Changes in organic aerosol composition with aging inferred from aerosol mass spectra, *Atmos. Chem. Phys.*, 11, 6465–6474, <https://doi.org/10.5194/acp-11-6465-2011>, 2011a.
- Ng, N. L., Canagaratna, M. R., Jimenez, J. L., Zhang, Q., Ulbrich, I. M., and Worsnop, D. R.: Real-Time Methods for Estimating Organic Component Mass Concentrations from Aerosol Mass Spectrometer Data, *Environ. Sci. Technol.*, 45, 910–916, <https://doi.org/10.1021/es102951k>, 2011b.
- Ng, N. L., Canagaratna, M. R., Zhang, Q., Jimenez, J. L., Tian, J., Ulbrich, I. M., Kroll, J. H., Docherty, K. S., Chhabra, P. S., Bahreini, R., Murphy, S. M., Seinfeld, J. H., Hildebrandt, L., Donahue, N. M., DeCarlo, P. F., Lanz, V. A., Prévôt, A. S. H., Dinar, E., Rudich, Y., and Worsnop, D. R.: Organic aerosol components observed in Northern Hemispheric datasets from Aerosol Mass Spectrometry, *Atmos. Chem. Phys.*, 10, 4625–4641, <https://doi.org/10.5194/acp-10-4625-2010>, 2010.
- Ortega, A. M., Ortega, D. A., Cubison, M. J., Brune, W. H., Bon, D., Gouw de, J. A., and Jimenez, J. L.: Secondary organic aerosol formation and primary organic aerosol oxidation from biomass-burning smoke in a flow reactor during FLAME-3, *Atmos. Chem. Phys.*, 13, 11551–11571, <https://doi.org/10.5194/acp-13-11551-2013>, 2013.
- Ortiz-Montalvo, D. L., Lim, Y. B., Perri, M. J., Seitzinger, S. P., and Turpin, B. J.: Volatility and Yield of Glycolaldehyde SOA Formed through Aqueous Photochemistry and Droplet Evaporation, *Aerosol Sci. Technol.*, 46, 1002–1014, <https://doi.org/10.1080/02786826.2012.686676>, 2012.
- Paatero, P.: The Multilinear Engine: A Table-Driven, Least Squares Program for Solving Multilinear Problems, Including the n-Way Parallel Factor Analysis Model,

- J. Comput. Graph. Stat., 8, 854–888, <https://doi.org/10.1080/10618600.1999.10474853>, 1999.
- Paatero, P. and Hopke, P. K.: Discarding or downweighting high-noise variables in factor analytic models, *Anal. Chim. Acta.*, 490, 277–289, [https://doi.org/10.1016/S0003-2670\(02\)01643-4](https://doi.org/10.1016/S0003-2670(02)01643-4), 2003.
- Paatero, P. and Tapper, U.: Positive matrix factorization: A non-negative factor model with optimal utilization of error estimates of data values, *Environmetrics*, 5, 111–126, <https://doi.org/10.1002/env.3170050203>, 1994.
- Paglionee, M., Gilardoni, S., Rinaldi, M., Decesari, S., Zanca, N., Sandrini, S., Giulianelli, L., Bacco, D., Ferrari, S., Poluzzi, V., Scotto, F., Trentini, A., Poulain, L., Herrmann, H., Wiedensohler, A., Canonaco, F., Prévôt, A. S. H., Massoli, P., Carbone, C., Facchini, M. C., and Fuzzi, S. C.: The impact of biomass burning and aqueous-phase processing on air quality: a multi-year source apportionment study in the Po Valley, Italy, *Atmos. Chem. Phys.*, 20, 1233–1254, <https://doi.org/10.5194/acp-20-1233-2020>, 2020.
- Qin, Y. M., Tan, H. B., Li, Y. J., Li, Z. J., Schurman, M. I., Liu, L., Wu, C., and Chan, C. K.: Chemical characteristics of brown carbon in atmospheric particles at a suburban site near Guangzhou, China, *Atmos. Chem. Phys.*, 18, 16409–16418, <https://doi.org/10.5194/acp-18-16409-2018>, 2018.
- Saleh, R., Robinson, E. S., Tkacik, D. S., Ahern, A. T., Liu, S., Aiken, A. C., Sullivan, R. C., Presto, A. A., Dubey, M. K., Yokelson, R. J., Donahue, N. M., and Robinson, A. L.: Brownness of organics in aerosols from biomass burning linked to their black carbon content, *Nat. Geosci.*, 7, 647–650, <https://doi.org/10.1038/ngeo2220>, 2014.

- Sun, Y. L., Du, W., Fu, P. Q., Wang, Q. Q., Li, J., Ge, X. L., Zhang, Q., Zhu, C. M., Ren, L. J., Xu, W. Q., Zhao, J., Han, T. T., Worsnop, D. R., and Wang, Z. F.: Primary and secondary aerosols in Beijing in winter: sources, variations and processes, *Atmos. Chem. Phys.*, 16, 8309–8329, <https://doi.org/10.5194/acp-16-8309-2016>, 2016a.
- Sun, Y. L., Zhang, Q., Anastasio, C., and Sun, J.: Insights into secondary organic aerosol formed via aqueous-phase reactions of phenolic compounds based on high resolution mass spectrometry, *Atmos. Chem. Phys.*, 10, 4809–4822, <https://doi.org/10.5194/acp-10-4809-2010>, 2010.
- Tan, Y., Lim, Y. B., Altieri, K. E., Seitzinger, S. P., and Turpin, B. J.: Mechanisms leading to oligomers and SOA through aqueous photooxidation: insights from OH radical oxidation of acetic acid and methylglyoxal, *Atmos. Chem. Phys.*, 12, 801–813, <https://doi.org/10.5194/acp-12-801-2012>, 2012.
- Tao, J., Gao, J., Zhang, L., Zhang, R., Che, H., Zhang, Z., Lin, Z., Jing, J., Cao, J., and Hsu, S. C.: PM<sub>2.5</sub> pollution in a megacity of southwest China: source apportionment and implication, *Atmos. Chem. Phys.*, c14, 8679–8699, <https://doi.org/10.5194/acp-14-8679-2014>, 2014.
- Wang, J. F., Ye, J. H., Zhang, Q., Zhao, J., Wu, Y. Z., Li, J. Y., Liu, D. T., Li, W. J., Zhang, Y. G., Wu, C., Xie, C. H., Qin, Y. M., Lei, Y. L., Huang, X. P., Guo, J. P., Liu, P. F., Fu, P. Q., Li, Y. J., Lee, H. C., Choi, H., Zhang, J., Liao, H., Chen, M. D., Sun, Y. L., Ge, X. L., Martin, S. T., and Jacob, D. J.: Aqueous production of secondary organic aerosol from fossil-fuel emissions in winter Beijing haze, *Proc. Natl. Acad. Sci. USA*, 118, e2022179118, <https://doi.org/10.1073/pnas.2022179118>, 2021.

- Wang, Q. Y., Ye, J. H., Wang, Y. C., Zhang, T., Ran, W. K., Wu, Y. F., Tian, J., Li, L., Zhou, Y. Q., Ho, H. S. S., Dang, B., Zhang, Q., Zhang, R. J., Chen, Y., Zhu, C. S., and Cao, J. J.: Wintertime Optical Properties of Primary and Secondary Brown Carbon at a Regional Site in the North China Plain, *Environ. Sci. Technol.*, 53, 12389–12397, <https://doi.org/10.1021/acs.est.9b03406>, 2019.
- Wang, Y. C., Huang, R. J., Ni, H. Y., Chen, Y., Wang, Q. Y., Li, G. H., Tie, X. X., Shen, Z. X., Huang, Y., Liu, S. X., Dong, W. M., Xue, P., Fröhlich, R., Canonaco, F., Elser, M., Daellenbach, K. R., Bozzetti, C., El Haddad, I., Prévôt, A. S. H., Canagaratna, M. R., Worsnop, D. R., and Cao, J. J.: Chemical composition, sources and secondary processes of aerosols in Baoji city of northwest China, *Atmos. Environ.*, 158, 128–137, <https://doi.org/10.1016/j.atmosenv.2017.03.026>, 2017.
- Washenfeller, R. A., Attwood, A. R., Brock, C. A., Guo, H., Xu, L., Weber, R. J., Ng, N. L., Allen, H. M., Ayres, B. R., Baumann, K., Cohen, R. C., Draper, D. C., Duffey, K. C., Edgerton, E., Fry, J. L., Hu, W. W., Jimenez, J. L., Palm, B. B., Romer, P., Stone, E. A., Wooldridge, P. J., and Brown, S. S.: Biomass burning dominates brown carbon absorption in the rural southeastern United States, *Geophys. Res. Lett.*, 42, 653–664, <https://doi.org/10.1002/2014gl062444>, 2015.
- Wu, C. and Yu, J. Z.: Determination of primary combustion source organic carbon-to-elemental carbon (OC/EC) ratio using ambient OC and EC measurements: Secondary OC-EC correlation minimization method, *Atmos. Chem. Phys.*, 16, 5453–5465, <https://doi.org/10.5194/acp-16-5453-2016>, 2016.
- Wu, H., Peng, C., Zhai, T. Y., Deng, J. C., Lu, P. L., Li, Z. L., Chen, Y., Tian, M., Bao, Z. E., Long, X., Yang, F. M., and Zhai, C. Z.: Characteristics of light absorption and environmental effects of Brown carbon aerosol in Chongqing during summer and winter based on online measurement: Implications of secondary formation,

- Atmos. Environ., 338, 120843, <https://doi.org/10.1016/j.atmosenv.2024.120843>, 2024.
- Xu, B. Q., Zhang, G., Gustafsson, Ö., Kawamura, K., Li, J., Andersson, A., Bikkina, S., Kunwar, B., Pokhrel, A., Zhong, G. C., Zhao, S. Z., Li, J., Huang, C., Cheng, Z. N., Zhu, S. Y., Peng, P. A., and Sheng, G. Y.: Large contribution of fossil-derived components to aqueous secondary organic aerosols in China, *Nat. Commun.*, 13, 5115, <https://doi.org/10.1038/s41467-022-32863-3>, 2022.
- Xu, W. Q., Han, T. T., Du, W., Wang, Q. Q., Chen, C., Zhao, J., Zhang, Y. J., Li, J., Fu, P. Q., Wang, Z. F., Worsnop, D. R., and Sun, Y. L.: Effects of Aqueous-Phase and Photochemical Processing on Secondary Organic Aerosol Formation and Evolution in Beijing, China, *Environ. Sci. Technol.*, 51, 762–770, <https://doi.org/10.1021/acs.est.6b04498>, 2017.
- Xu, W. Q., Sun, Y. L., Chen, C., Du, W., Han, T. T., Wang, Q. Q., Fu, P. Q., Wang, Z. F., Zhao, X. J., Zhou, L. B., Ji, D. S., Wang, P. C., and Worsnop, D. R.: Aerosol composition, oxidation properties, and sources in Beijing: results from the 2014 Asia-Pacific Economic Cooperation summit study, *Atmos. Chem. Phys.*, 15, 13681–13698, <https://doi.org/10.5194/acp-15-13681-2015>, 2015.
- Xu, W. Q., Sun, Y. L., Wang, Q. Q., Zhao, J., Wang, J. F., Ge, X. L., Xie, C. J., Zhou, W., Du, W., Li, J., Fu, P. Q., Wang, Z. F., Worsnop, D. R., and Coe, H.: Changes in Aerosol Chemistry From 2014 to 2016 in Winter in Beijing: Insights From High-Resolution Aerosol Mass Spectrometry, *J. Geophys. Res.: Atmos.*, 124, 1132–1147, <https://doi.org/10.1029/2018JD029245>, 2019.
- Yu, L., Smith, J., Laskin, A., Anastasio, C., Laskin, J., Zhang, Q.: Chemical characterization of SOA formed from aqueous-phase reactions of phenols with the



- triplet excited state of carbonyl and hydroxyl radical, *Atmos. Chem. Phys.*, 14, 13801–13816, <https://doi.org/10.5194/acp-14-13801-2014>, 2014.
- Zhao, J., Du, W., Zhang, Y. J., Wang, Q. Q., Chen, C., Xu, W. Q., Han, T. T., Wang, Y. Y., Fu, P. Q., Wang, Z. F., Li, Z. Q., and Sun, Y. L.: Insights into aerosol chemistry during the 2015 China Victory Day parade: results from simultaneous measurements at ground level and 260 m in Beijing, *Atmos. Chem. Phys.*, 17, 3215–3232, <https://doi.org/10.5194/acp-17-3215-2017>, 2017.
- Zhao, J., Qiu, Y. M., Zhou, W., Xu, W. Q., Wang, J. F., Zhang, Y. J., Li, L. J., Xie, C. H., Wang, Q. Q., Du, W., Worsnop, D. R., Canagaratna, M. R., Zhou, L. B., Ge, X. L., Fu, P. Q., Li, J., Wang, Z. F., Donahue, N. M., and Sun, Y. L.: Organic Aerosol Processing During Winter Severe Haze Episodes in Beijing, *J. Geophys. Res.: Atmos.*, 124, 10248–10263, <https://doi.org/10.1029/2019JD030832>, 2019.
- Zhao, R., Mungall, E. L., Lee, A. K. Y., Aljawhary, D., and Abbatt, J. P. D.: Aqueous-phase photooxidation of levoglucosan – a mechanistic study using aerosol time-of-flight chemical ionization mass spectrometry (Aerosol ToF-CIMS), *Atmos. Chem. Phys.*, 14, 9695–9706, <https://doi.org/10.5194/acp-14-9695-2014>, 2014.
- Zhong, H. B., Huang, R. J., Chang, Y. H., Duan, J., Lin, C. S., and Chen, Y.: Enhanced formation of secondary organic aerosol from photochemical oxidation during the COVID-19 lockdown in a background site in Northwest China, *Sci. Total Environ.*, 778, 144947, <https://doi.org/10.1016/j.scitotenv.2021.144947>, 2021.
- Zhong, H. B., Huang, R. J., Duan, J., Lin, C. S., Gu, Y. F., Wang, Y., Li, Y. J., Zheng, Y., Chen, Q., Chen, Y., Dai, W. T., Ni, H. Y., Chang, Y. H., Worsnop, D. R., Xu, W., Ovadnevaite, J., Ceburnis, D., and O'Dowd, C. D.: Seasonal variations in the sources of organic aerosol in Xi'an, Northwest China: the importance of biomass

burning and secondary formation, *Sci. Total Environ.*, 737, 139666, <https://doi.org/10.1016/j.scitotenv.2020.139666>, 2020.

Zhu, C. S., Cao, J. J., Hu, T. F., Shen, Z. X., Tie, X. X., Huang, H., Wang, Q. Y., Huang, R. J., Zhao, Z. Z., Mocnik, G., and Hansen, A. D. A.: Spectral dependence of aerosol light absorption at an urban and a remote site over the Tibetan Plateau, *Sci. Total Environ.*, 590–591, 14–21, <https://doi.org/10.1016/j.scitotenv.2017.03.057>, 2017.
